# Supplementary material
Source: Springer Nature journal article supplement (https://www.springermedizin.de/resource/supplementary/13256_2009_1161_MOESM4_ESM.pdf/9647142)

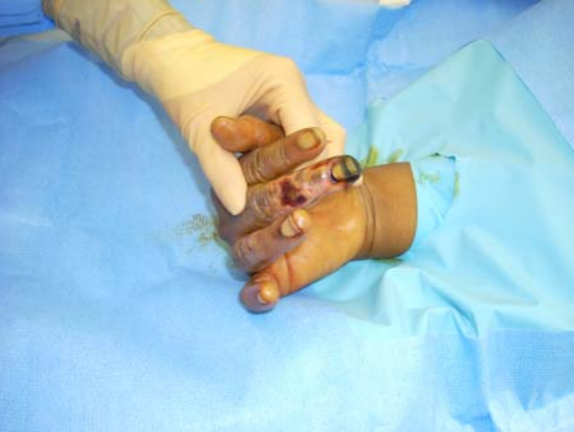

Supplement: MOESM4 [file 9647142]
